# Supplementary material
Source: PubMed Central journal article supplement (PMC2846040)
Supplement: JCI39492sd.pdf [file JCI39492sd.pdf]

# Supplemental Figure 1

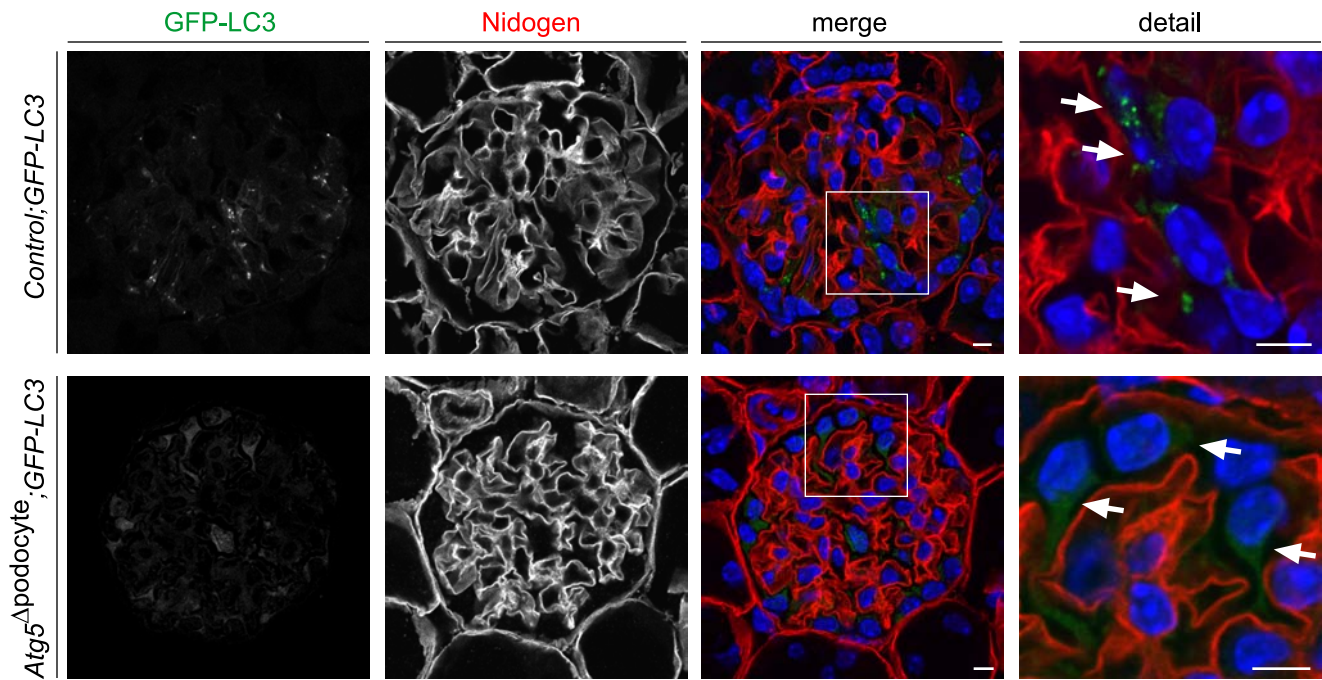

**Supplemental Fig. 1: Absence of GFP-LC3 positive vesicles in podocytes of *Atg5*<sup>Δpodocyte</sup>; *GFP-LC3* mice.**

Podocyte-specific *Atg5* deficient mice (*Atg5*<sup>Δpodocyte</sup>) were crossed to *GFP-LC3* transgenic mice to confirm the functional ablation of autophagy. In these triple transgenic mice glomerular GFP-LC3 positive vesicles were completely absent and GFP-LC3 was diffusely distributed in the cytoplasm, while GFP-positive autophagosomes could be detected in control *GFP-LC3* mice (arrows indicate GFP-LC3 positive autophagosomes in the control condition or cytosolic GFP-LC3 signal in the *Atg5* knockout condition respectively). Scale bars: 5  $\mu$ m.

## Supplemental Figure 2

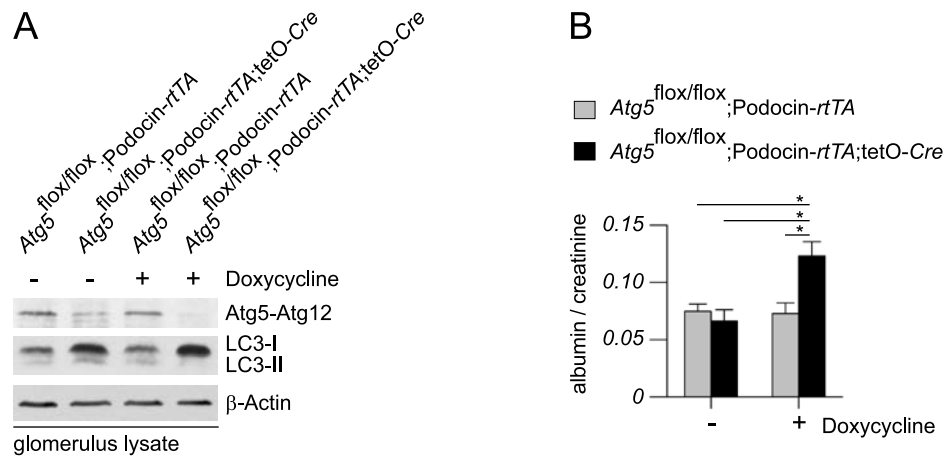

**Supplemental Fig. 2: Doxycycline dependent induction of podocyte specific *Atg5* knockout.** (A) *Atg5*-floxed mice (*Atg5*<sup>flox/flox</sup>) were crossed with Podocin-rtTA;tetO-Cre to generate Doxycycline-inducible podocyte-specific *Atg5* knockout mice (*Atg5*<sup>flox/flox</sup>;Podocin-rtTA<sup>+</sup>;tetO-Cre<sup>+</sup>); tetO-Cre<sup>-</sup> littermates served as control. Western blot analysis of isolated glomeruli from *Atg5*<sup>flox/flox</sup>;Podocin-rtTA<sup>+</sup>;tetO-Cre<sup>+</sup> or *Atg5*<sup>flox/flox</sup>;Podocin-rtTA<sup>+</sup> mice confirmed the absence of Atg5 after Doxycycline administration and displayed the abrogated conversion of LC3-I. (B) Induction podocyte-specific *Atg5* knockout in 12 weeks old mice resulted in a significant increased albuminuria (n=6 for each condition, \*=two-tailed Student's t-test p<0.05).

# Supplemental Figure 3

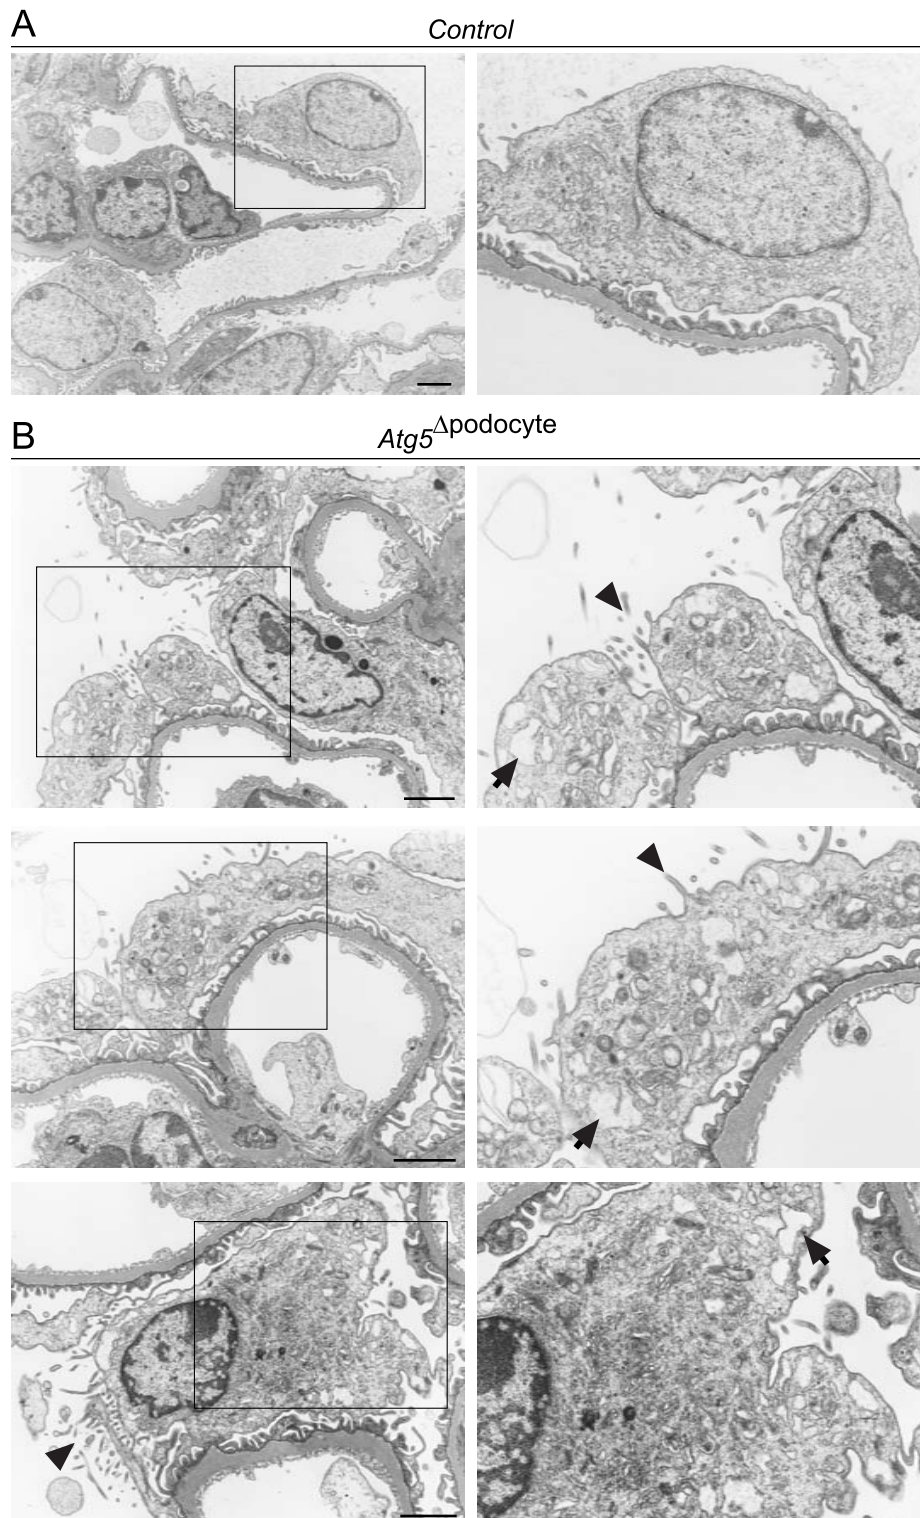

**Supplemental Fig. 3: Detailed EM analysis of 12 month old *Atg5<sup>Δ</sup>podocyte* mice with mild albuminuria.**

**(A)** Control littermates showed normal podocyte morphology with a regular foot process network.

**(B)** *Atg5<sup>Δ</sup>podocyte* mice displayed abnormalities such as cisternal distension of rough ER (arrows), aberrant membranous structures, and microvillus formation (arrowheads). Scale bars: 2  $\mu$ m.

# Supplemental Figure 4

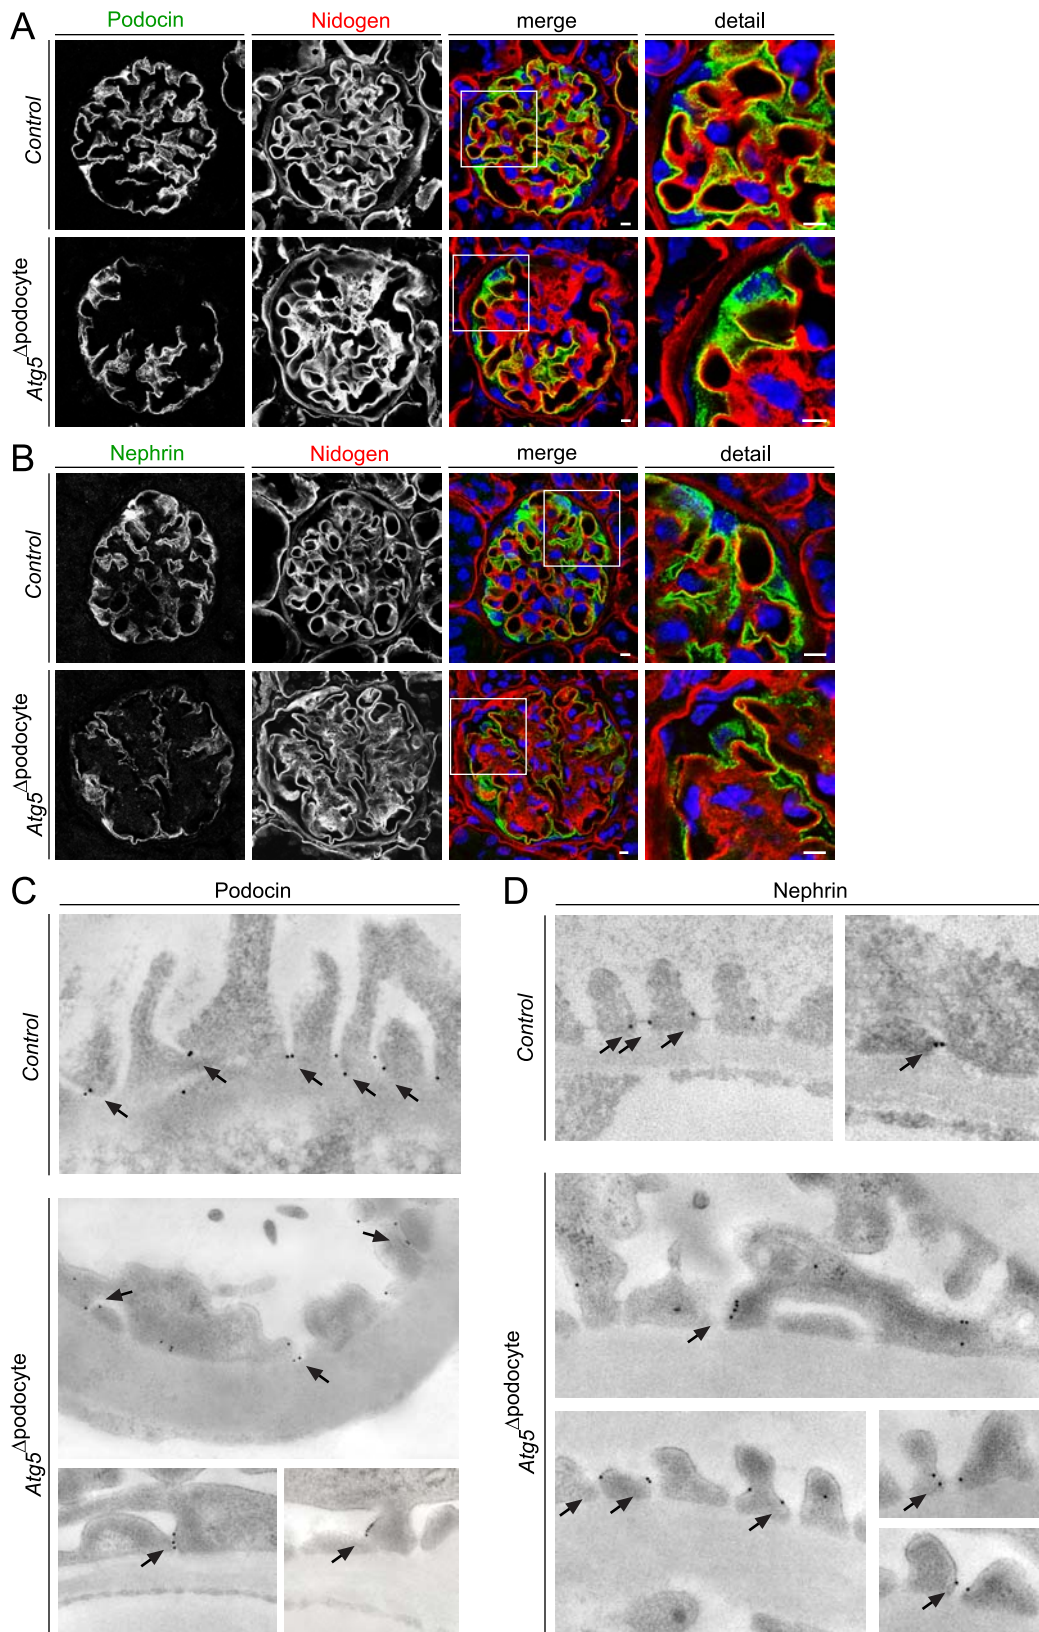

**Supplemental Fig. 4: Slit diaphragm proteins in 22 month old *Atg5*<sup>Δpodocyte</sup> mice.** Immunofluorescence and specific immunogold stainings of the slit diaphragm proteins podocin (**A**, **C**) and nephrin (**B**, **D**) in non-sclerosed glomeruli of 22 month old *Atg5*<sup>Δpodocyte</sup> and control mice. Nidogen served as basement membrane marker. Scale bars: 5  $\mu$ m. Arrows indicate gold particles.

# Supplemental Figure 5

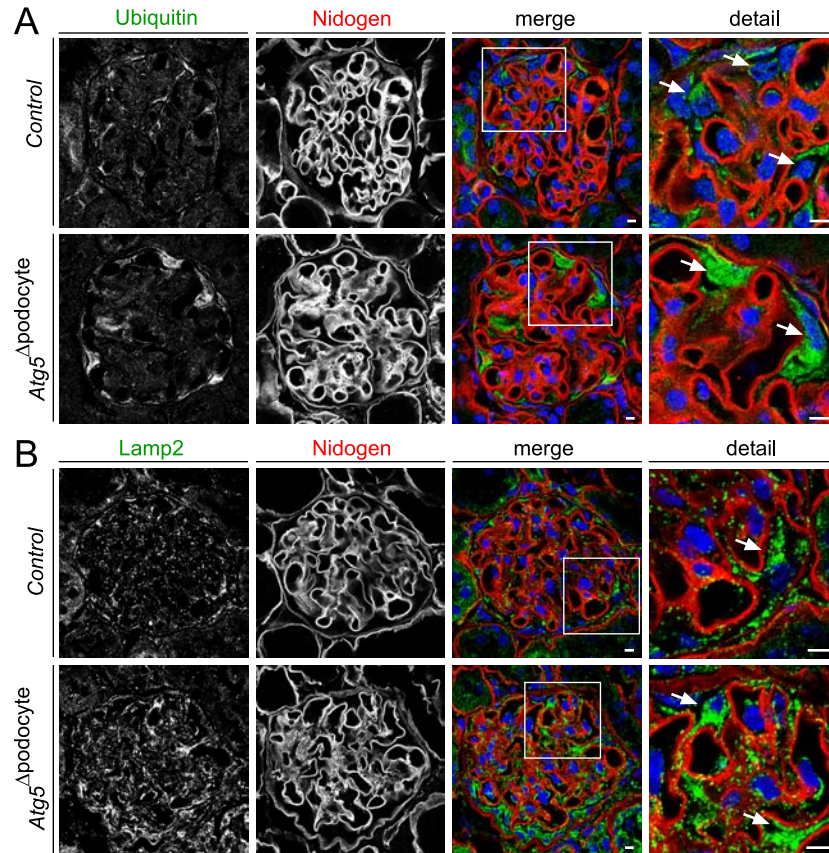

**Supplemental Fig. 5: Protein degradative pathways in 22 month old *Atg5* $\Delta$ podocyte mice.** Confocal microscopy of kidneys from *Atg5* $\Delta$ podocyte and control mice demonstrated an accumulation of ubiquitin positive aggregates (**A**) and Lamp2 positive structures (**B**) in *Atg5* $\Delta$ podocyte mice. Arrows indicate podocytes. Scale bars: 5  $\mu$ m.

## Supplemental Figure 6

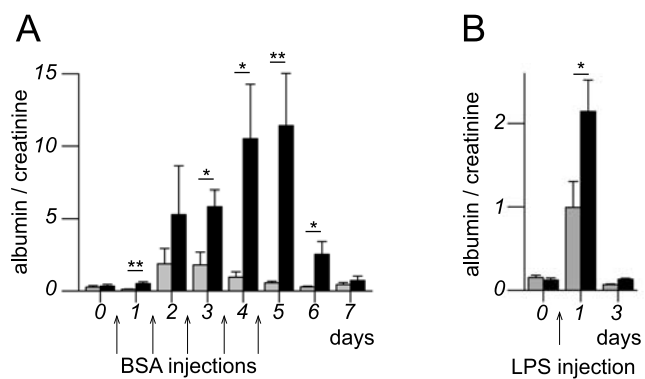

**Supplemental Fig. 6: Induction of albuminuria in the BSA overload model and LPS model.**

Low doses of BSA (**A**) or LPS (**B**) respectively caused a significant higher transient albuminuria in *Atg5* $\Delta$ podocyte mice compared to control littermates (BSA n=6 for control- and n=5 *Atg5* $\Delta$ podocyte mice, LPS n=4 for control and *Atg5* $\Delta$ podocyte mice, \* =two-tailed Student's t-test p<0.05).

# Supplemental Figure 7

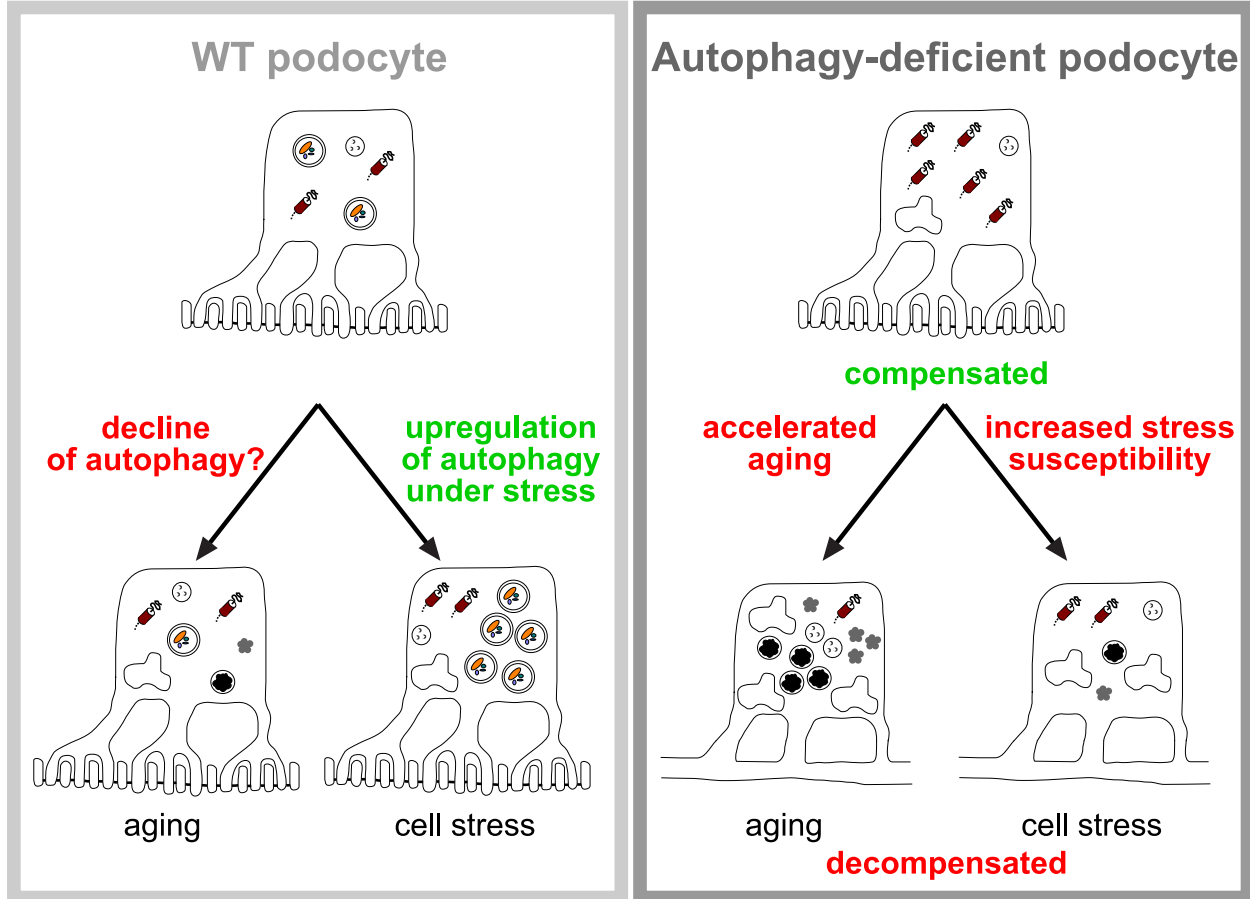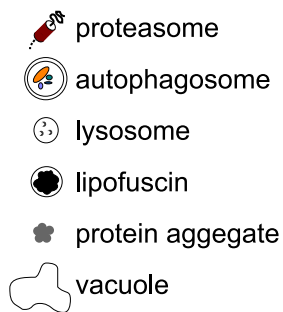

**Supplemental Fig. 7: Autophagy controls podocyte aging, maintenance and glomerular disease susceptibility.** Schematic illustration summarizing the role of autophagy for glomerular biology and glomerular disease: Autophagy is an important mechanism for podocyte homeostasis and maintenance, and a decline of autophagy might contribute to the age-related loss of glomerular function. Genetic deletion of autophagy in podocytes results in an accelerated podocyte aging and a dramatically increased susceptibility to glomerular stress. The autophagy-lysosome system and the UPS appear to be functionally coupled and *Atg5* deficient podocytes upregulate the proteasome activity to partially compensate for the loss of autophagy.
